# Supplementary material
Source: PubMed Central journal article supplement (PMC6151148)
Supplement: NIHMS1503509-supplement-1.pdf [file NIHMS1503509-supplement-1.pdf]

Figure S1

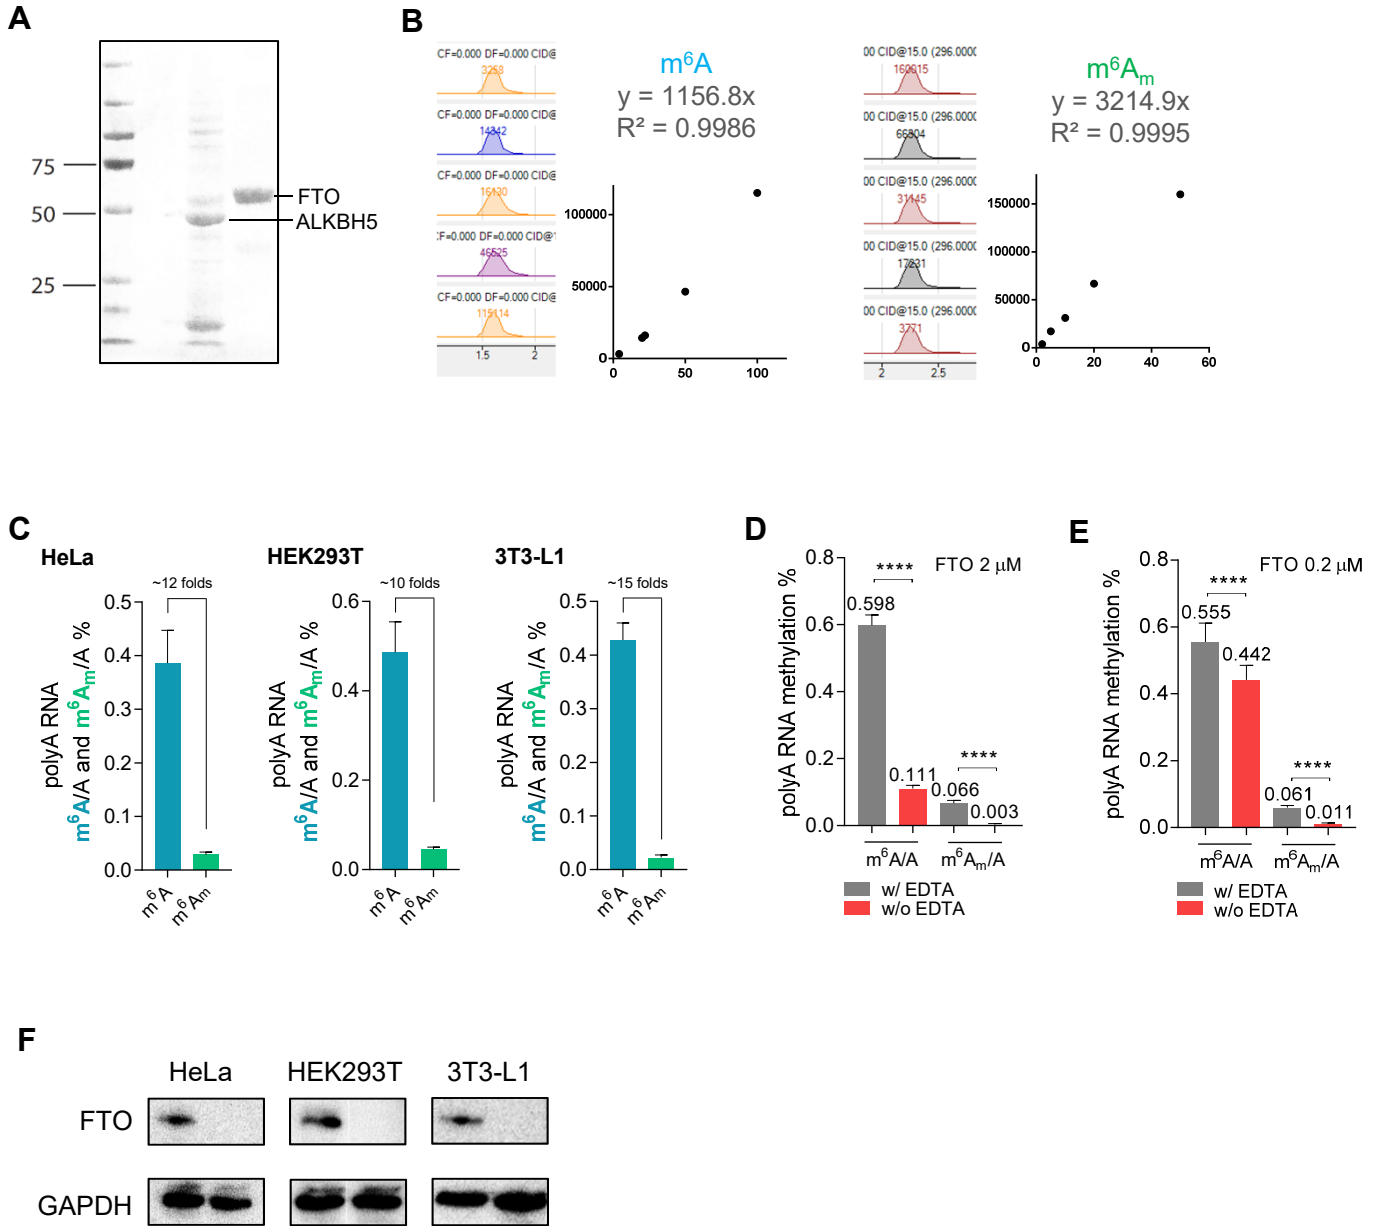

**Figure S1. FTO Demethylates Both Internal m<sup>6</sup>A and Cap m<sup>6</sup>A<sub>m</sub> *in vitro*, Related to Figure 1.**

(A) Coomassie blue analysis of purified mammalian FTO.

(B) Left: LC-MS/MS channel, peak area and standard curve for the m<sup>6</sup>A modification; Right: LC-MS/MS channel, peak area and standard curve for the m<sup>6</sup>A<sub>m</sub> modification.

(C) Quantification of the m<sup>6</sup>A/ m<sup>6</sup>A<sub>m</sub> ratio in HeLa, HEK293T and 3T3-L1 cells by LC-MS/MS, showing that the m<sup>6</sup>A to m<sup>6</sup>A<sub>m</sub> ratios are consistently around 10-fold in HeLa, HEK293T, and 3T3-L1 cells.

(D) and (E) Quantification of methylation percentage of the m<sup>6</sup>A/A ratio and the m<sup>6</sup>A<sub>m</sub>/A ratio by LC-MS/MS *in vitro*. (D) Incubated with 200 ng purified polyadenylated RNA from HEK293T cells for 1 h under the reported demethylation conditions: 2 μM recombinant FTO in the 20 μl solution was able to demethylate ~81% internal m<sup>6</sup>A and ~95% cap m<sup>6</sup>A<sub>m</sub>; (E) Incubated with 200 ng purified polyadenylated RNA from HEK293T cells for 1 h under the reported demethylation conditions: 0.2 μM recombinant FTO in the 20 μl solution was able to demethylate ~20% internal m<sup>6</sup>A and ~82% cap m<sup>6</sup>A<sub>m</sub>.

(F) Western blot of the knockdown of FTO in HeLa, HEK293T and 3T3-L1 cells. *P* values were determined using Student's t-test. \**p* < 0.05, \*\**p* < 0.01, \*\*\**p* < 0.001, \*\*\*\**p* < 0.0001. *n.s.* means not significant. Error bars, mean ± s.d. for *n* = 6 experiments in (C) to (E).

Figure S2

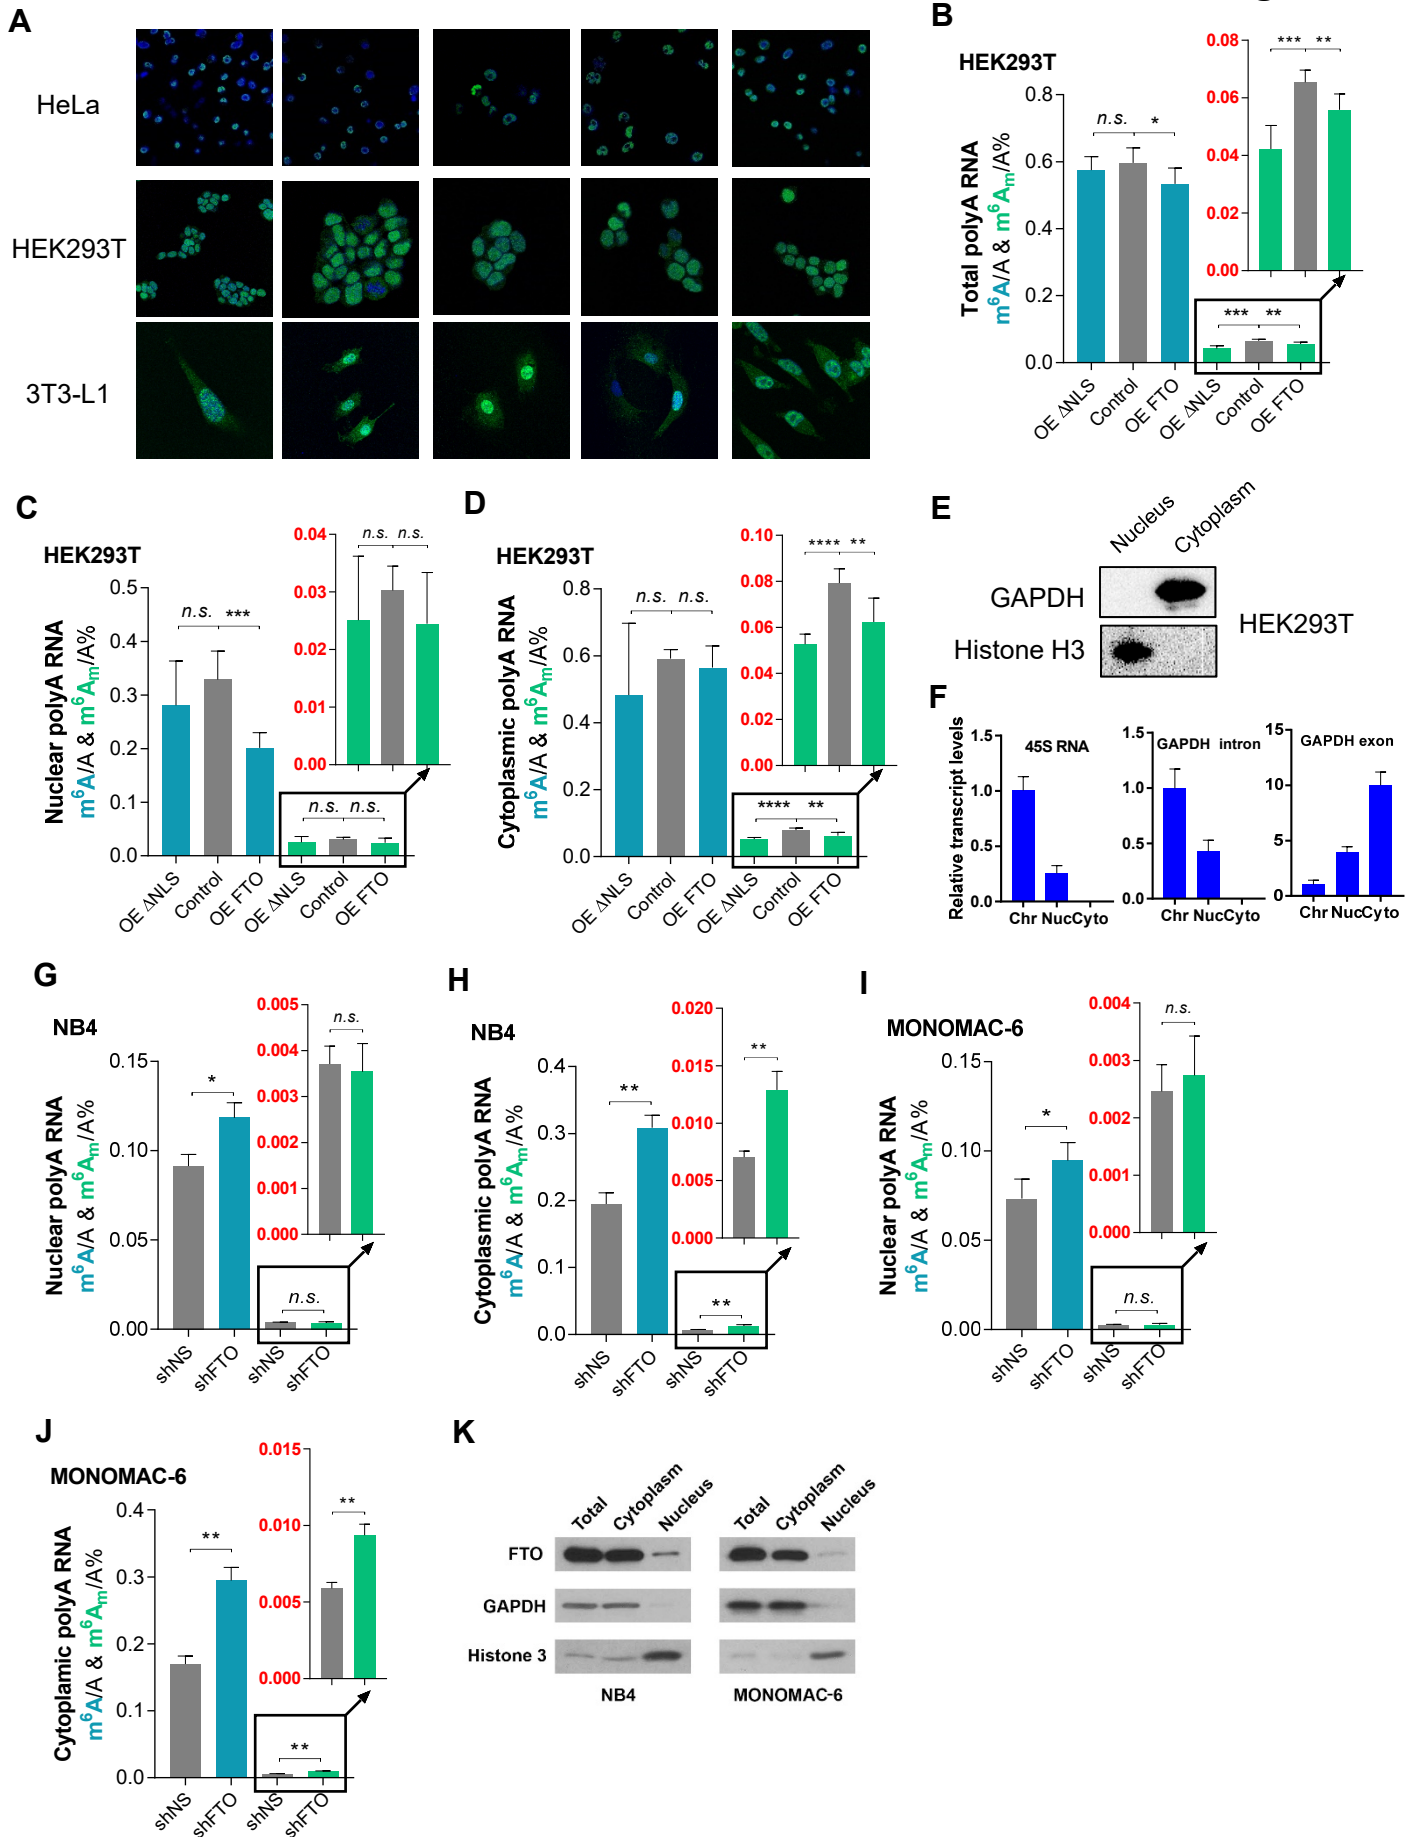

**Figure S2. FTO Differentially Mediates Internal m<sup>6</sup>A or Cap m<sup>6</sup>A<sub>m</sub> Demethylation in the Polyadenylated RNA in the Nucleus and the Cytoplasm, Related to Figure 2.**

(A) Five representative immunofluorescent pictures of the endogenous FTO in HeLa, HEK293T and 3T3-L1 cells.

(B) to (D) Quantification of the m<sup>6</sup>A/A ratio (blue bars) and the cap m<sup>6</sup>A<sub>m</sub>/A ratio (green bars) in the polyadenylated RNA from HEK293T cells by LC-MS/MS. In comparison to the control: (B) the overexpression of the wild-type FTO but not the ΔNLS-FTO (FTO without nuclear localization signal) led to significant decreases of the m<sup>6</sup>A/A ratio in the total polyadenylated RNA; while the overexpression of both the ΔNLS-FTO and the wild-type FTO led to noticeable decreases of the m<sup>6</sup>A<sub>m</sub>/A ratio in the total polyadenylated RNA; (C) overexpression of wild-type FTO led to a significant decrease of the m<sup>6</sup>A/A ratio but not the m<sup>6</sup>A<sub>m</sub>/A ratio in the nuclear polyadenylated RNA, while the overexpression of ΔNLS-FTO did not result in significant decreases in the m<sup>6</sup>A/A or the m<sup>6</sup>A<sub>m</sub>/A ratios in the nuclear polyadenylated RNA; (D) the overexpression of both the ΔNLS-FTO and the wild-type FTO led to a significant decrease of the m<sup>6</sup>A<sub>m</sub>/A ratio but not the m<sup>6</sup>A/A ratio in the cytoplasmic polyadenylated RNA.

(E) Western blot validation of cytoplasm and nucleus separation in HEK293T cells.

(F) qRT-PCR validation of cytoplasm and nucleus separation in HEK293T cells.

(G) and (H) Quantification of the m<sup>6</sup>A/A ratio (blue bars) and the cap m<sup>6</sup>A<sub>m</sub>/A ratio (green bars) in the polyadenylated RNA from NB4 cells by LC-MS/MS. Stable knockdown of FTO led to (G) the increased m<sup>6</sup>A/A ratio but not the cap m<sup>6</sup>A<sub>m</sub>/A ratio in the nuclear polyadenylated RNA and (H) both increased m<sup>6</sup>A/A ratio and the cap m<sup>6</sup>A<sub>m</sub>/A ratio in the cytoplasmic polyadenylated RNA.

(I) and (J) Quantification of the m<sup>6</sup>A/A ratio (blue bars) and the cap m<sup>6</sup>A<sub>m</sub>/A ratio (green bars) in polyadenylated RNA from MONOMAC-6 cells by LC-MS/MS. Stable knockdown of FTO led to (I) the increased m<sup>6</sup>A/A ratio but not the cap m<sup>6</sup>A<sub>m</sub>/A ratio in the nuclear polyadenylated RNA and (J) both increased m<sup>6</sup>A/A and the cap m<sup>6</sup>A<sub>m</sub>/A ratios in the cytoplasmic polyadenylated RNA.

(K) Western blot of the FTO in total, cytoplasm and nucleus in NB4 and MONOMAC-6 cells. *P* values were determined using Student's t-test. \**p* < 0.05, \*\**p* < 0.01, \*\*\**p* < 0.001, \*\*\*\**p* < 0.0001. *n.s.* means not significant. Error bars, mean ± s.d. for *n* = 6 experiments in (B) to (D); for *n* = 4 experiments in (G) to (J).

Figure S3

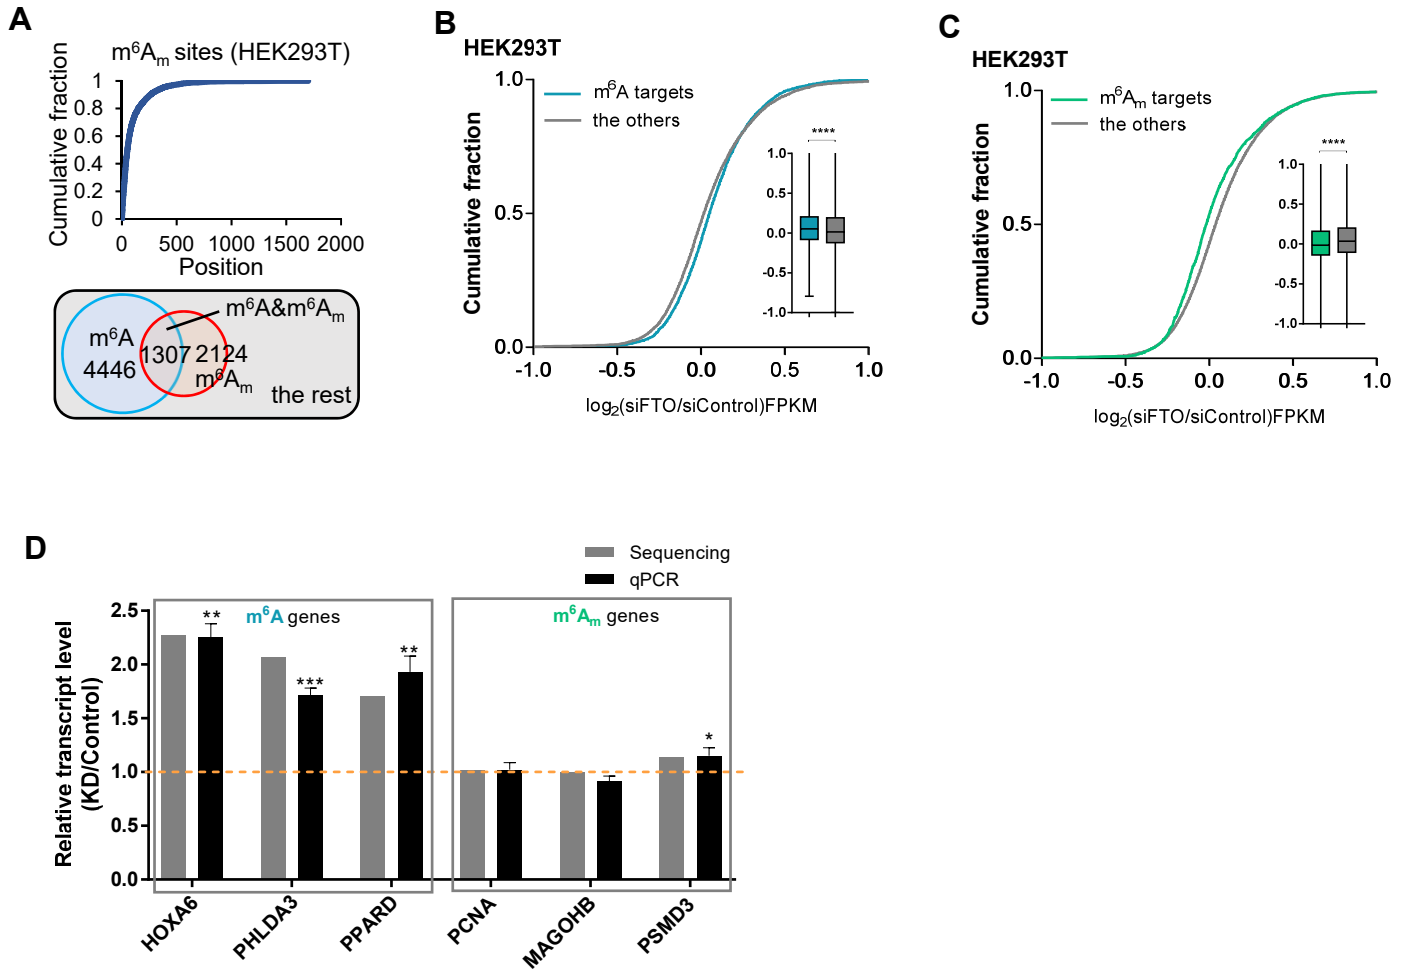

**Figure S3. Dynamic Regulation of m<sup>6</sup>A but not Cap m<sup>6</sup>A<sub>m</sub> Influences mRNA Transcript Levels, Related to Figure 3.**

(A) Cumulative fraction of the m<sup>6</sup>A<sub>m</sub> sites along mRNA beginning with the transcription start site (top). Scheme for the transcripts grouping method (bottom).

(B) mRNAs were classified into the transcripts containing only internal m<sup>6</sup>A and the rest as control. In HEK293T cells, FTO knockdown led to a significant increased global transcript level changes of the transcripts containing only m<sup>6</sup>A ( $n = 3987$ , m<sup>6</sup>A only;  $n = 8921$ , the rest).

(C) mRNAs are classified into the transcripts containing cap m<sup>6</sup>A<sub>m</sub> only and the rest as control. In HEK293T cells, compared to the transcripts that do not contain m<sup>6</sup>A<sub>m</sub>, FTO knockdown led to a significantly less global transcript level changes of the transcripts containing only m<sup>6</sup>A compared to the rest ( $n = 1885$ , m<sup>6</sup>A only;  $n = 11023$ , the rest).  $P$  values were determined using Mann-Whitney test. \* $p < 0.05$ , \*\* $p < 0.01$ , \*\*\* $p < 0.001$ , \*\*\*\* $p < 0.0001$ . *n.s.* means not significant. Error bars, mean  $\pm$  s.d. in (B) and (C). Data represent the average from two independent mRNA expression datasets; each box shows the first quartile, median, and third quartile.

(D) qRT-PCR validation of transcript level changes of three genes containing only m<sup>6</sup>A and three genes containing only m<sup>6</sup>A<sub>m</sub>. \* $p < 0.05$ , \*\* $p < 0.01$ , \*\*\* $p < 0.001$ , \*\*\*\* $p < 0.0001$ . *n.s.* means not significant. Error bars, mean  $\pm$  s.d. for  $n = 6$  experiments in (D).

Figure S4

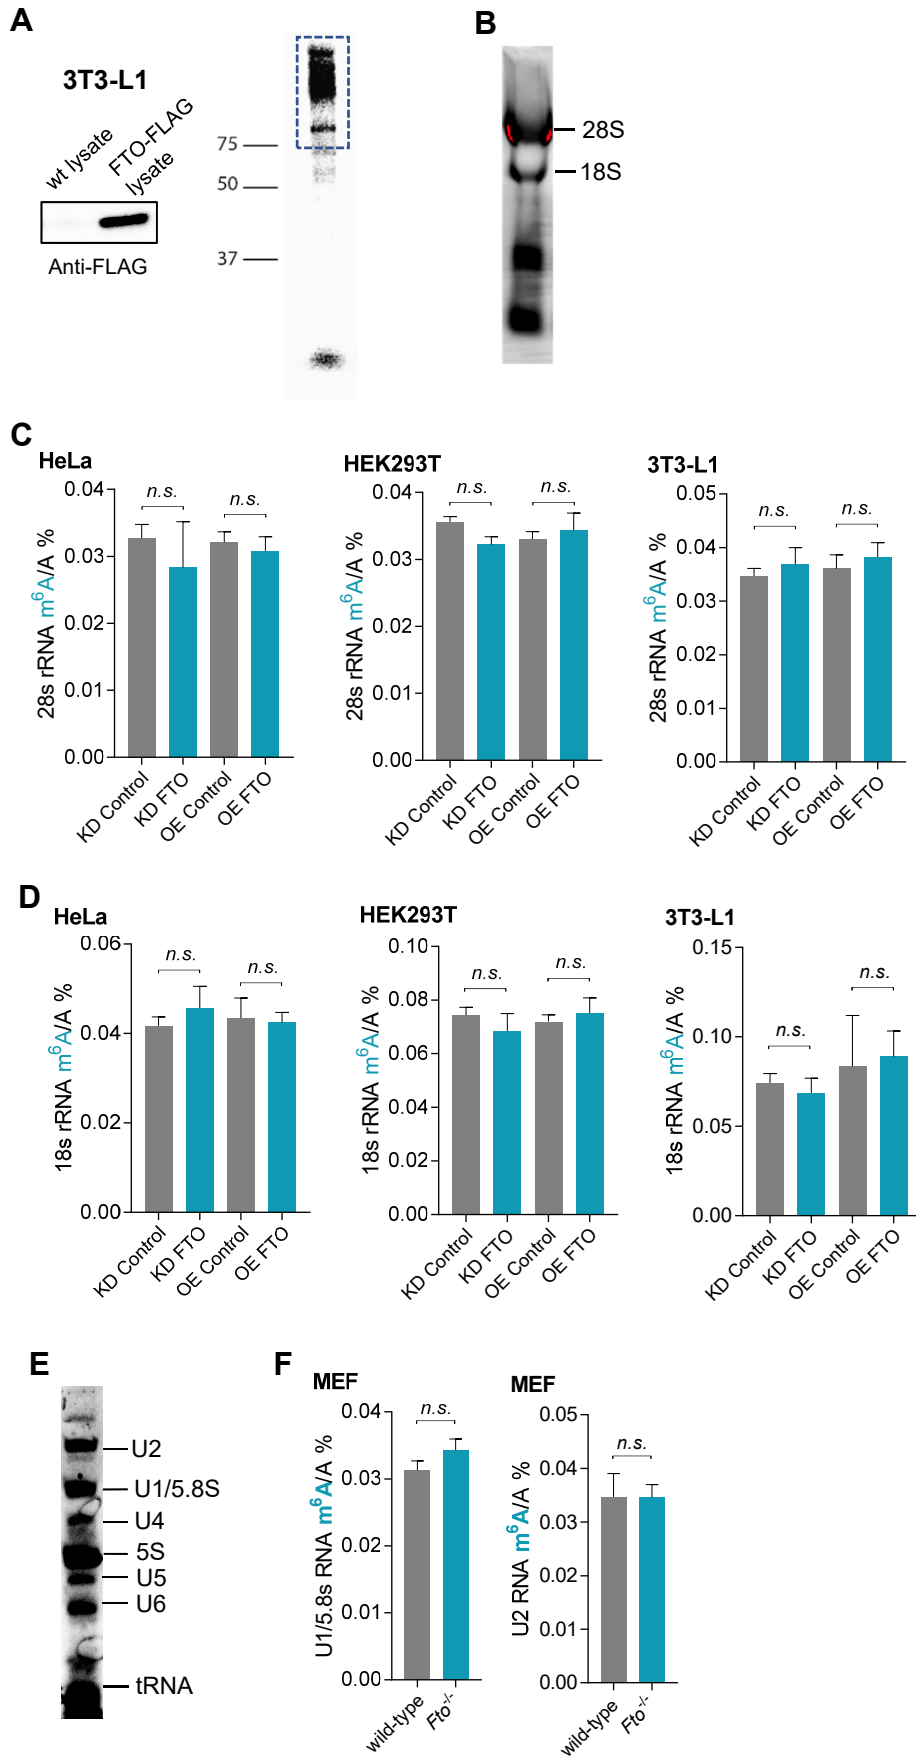

**Figure S4. Quantification of the m<sup>6</sup>A Level Changes inside Cell in the FTO-Associated RNA Species, Related to Figure 4.**

(A) Left: Western blot validation of anti-FLAG pulldown purity; right: SDS-PAGE protein gel of <sup>32</sup>P labeled FTO-nucleic acids complex.

(B) Separation of 28S rRNA and 18S rRNA from total RNA shown on a 2% agarose gel.

(C) and (D) Quantification of the m<sup>6</sup>A/A ratio in rRNA by LC-MS/MS. In comparison to the control, no obvious changes of m<sup>6</sup>A/A ratio (C) in 28S rRNA or (D) in 18S rRNA were observed in HeLa, HEK293T, and 3T3-L1 cell lines upon the alterations of FTO expression.

(E) Separation of individual snRNAs from the purified nuclear RNA below 200 nucleotides shown on the 6% TEB-Urea gel.

(F) Quantification of the m<sup>6</sup>A/A ratio in U1/5.8s RNA and U2 RNA by LC-MS/MS. No obvious change was observed in the Fto knockout MEF cells compared to the wild-type control. \*p < 0.05, \*\*p < 0.01, \*\*\*p < 0.001, \*\*\*\*p < 0.0001. *n.s.* means not significant. Error bars, mean ± s.d. for *n* = 3 experiments in (C) and (D); and for *n* = 6 experiments in (F).



Figure S5

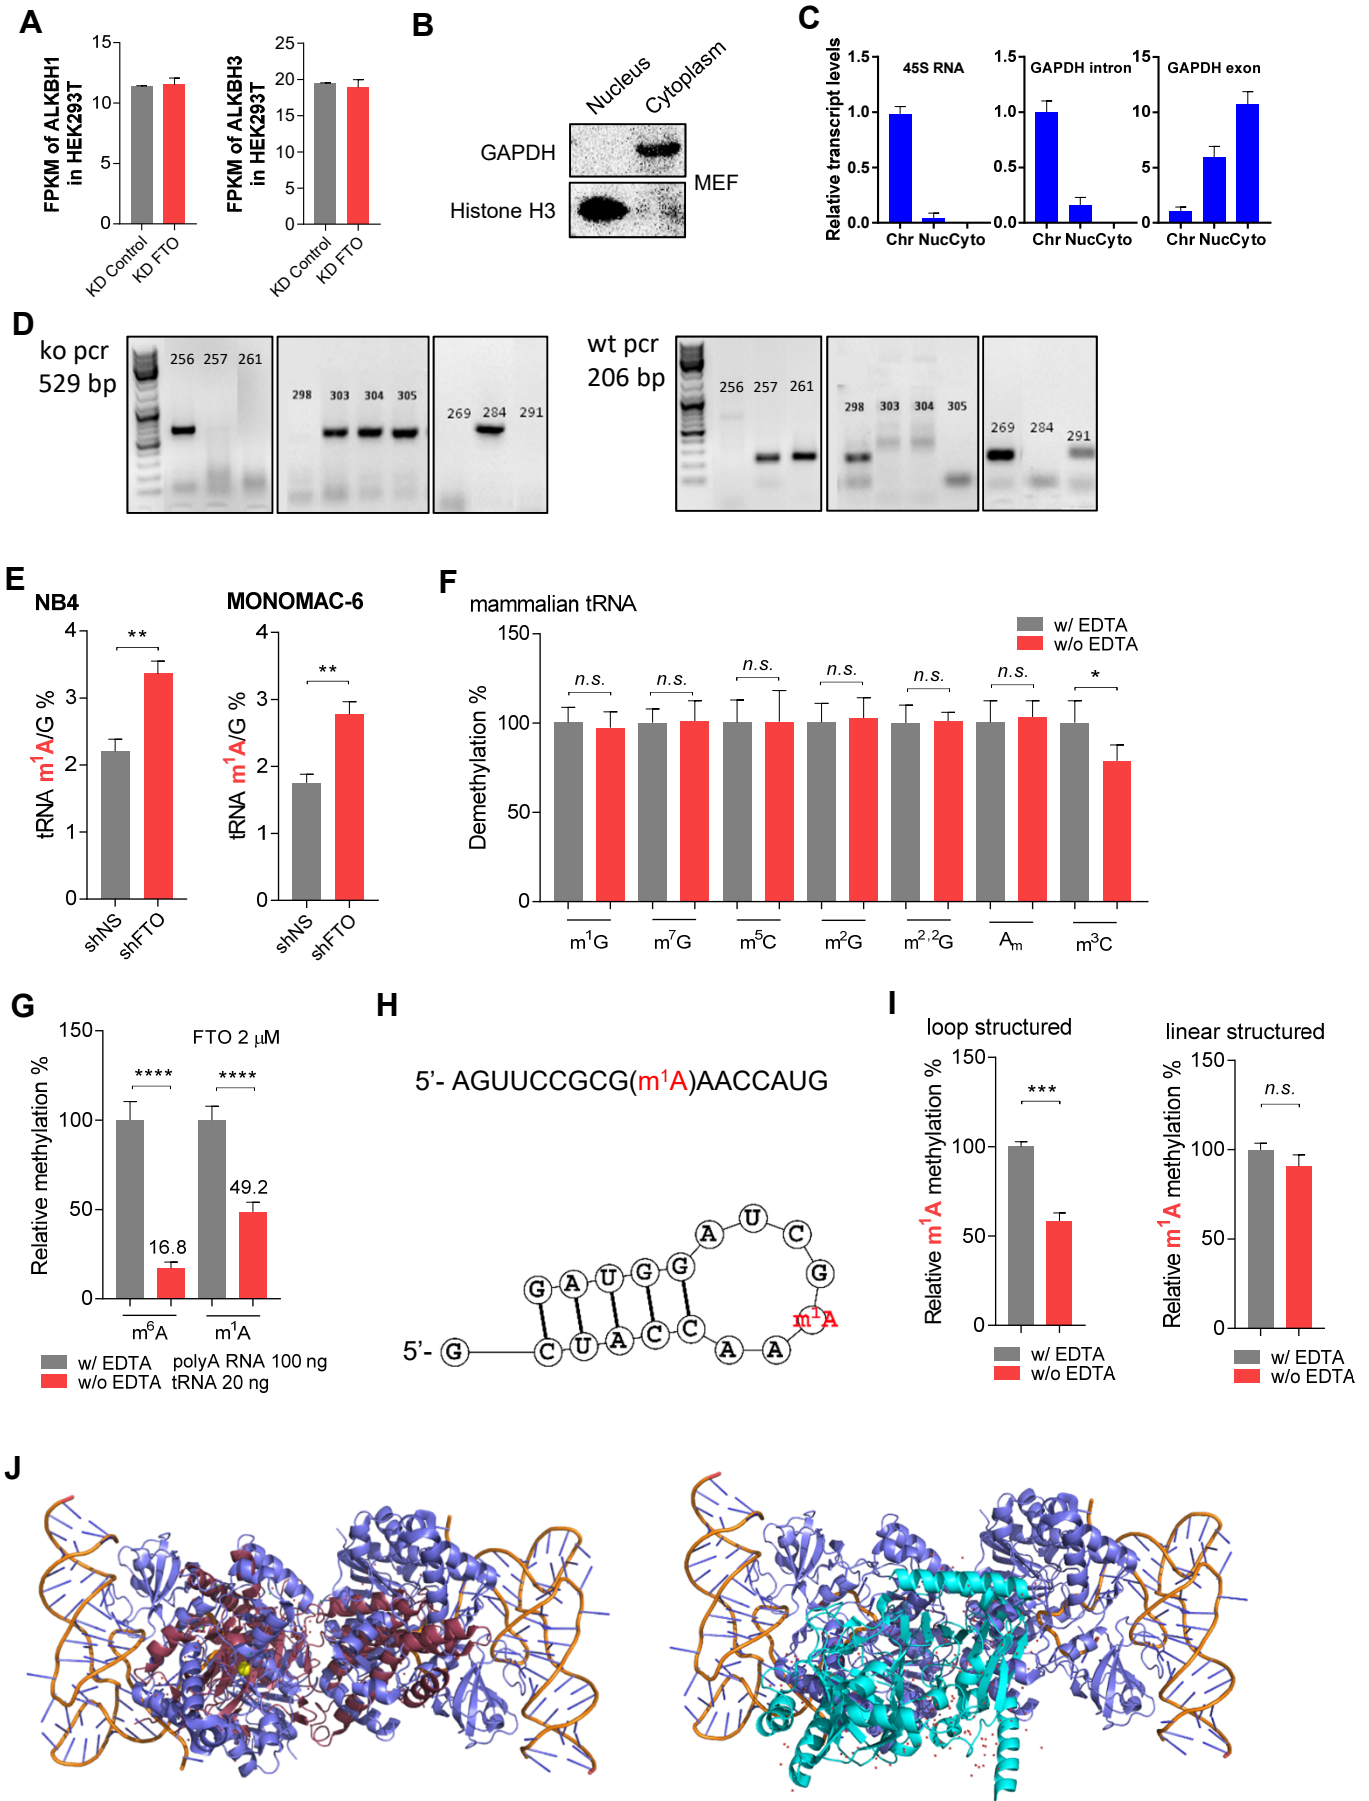

**Figure S5. Quantification of m<sup>1</sup>A Level Changes in AML cells, Control Experiments for tRNA m<sup>1</sup>A Demethylation, and Structure Correlation of FTO with tRNA, Related to Figure 5.**

- (A) Relative gene expression of ALKBH1 and ALKBH3 from RNA-seq in the HEK293T cells upon the knockdown of FTO. NO changes were observed for both ALKBH1 and ALKBH3.
- (B) Western blot validation of cytoplasm and nucleus separation in MEF cells.
- (C) qRT-PCR validation of cytoplasm and nucleus separation in MEF cells.
- (D) PCR validation for *Fto*<sup>-/-</sup> and wild-type mouse.
- (E) Quantification of the m<sup>1</sup>A/G ratio in tRNA, showing the increased m<sup>1</sup>A/G in NB4 and MONOMAC-6 cells upon stable FTO knockdown.
- (F) Demethylation of total tRNA isolated from HEK293T cells by mammalian FTO *in vitro*. Slightly decrease of m<sup>3</sup>C/G ratio can be observed but no obvious changes of m<sup>1</sup>G/G, m<sup>7</sup>G/G, m<sup>5</sup>C/G, m<sup>2</sup>G/G, m<sup>2</sup><sub>2</sub>G/G, or A<sub>m</sub>/G ratios can be observed.
- (G) Demethylation of total tRNA and polyadenylated RNA isolated from HEK293T cells by mammalian FTO *in vitro*. With the similar numbers of m<sup>1</sup>A and m<sup>6</sup>A molecule, the demethylation activity towards m<sup>1</sup>A is slightly lower than m<sup>6</sup>A.
- (H) Sequence of the linear ssRNA probe containing m<sup>1</sup>A (top); sequence of the loop-structured ssRNA probe containing m<sup>1</sup>A and predicted structure by RNA fold server (<http://rna.tbi.univie.ac.at/cgi-bin/RNAWebSuite/RNAfold.cgi>).
- (I) FTO exhibits m<sup>1</sup>A demethylation activity preferentially in the loop structure revealed by *in vitro* demethylation assays with m<sup>1</sup>A in a linear ssRNA probe and m<sup>1</sup>A in a stem-loop structured probe.
- (J) Left: overlapped structures of FTO (raspberry) with the complex of NSUN6 (purple) and tRNA (orange). The iron center of FTO is depicted in yellow ball; right: overlapped structures of ALKBH5 (green) with the complex of NSUN6 (purple) and tRNA (orange). *P* values were determined using Student's t-test. \**p* < 0.05, \*\**p* < 0.01, \*\*\**p* < 0.001, \*\*\*\**p* < 0.0001. *n.s.* means not significant. Error bars, mean ± s.d. for *n* = 3 experiments in (F), (G), and (I); for *n* = 4 experiments in (E).

Figure S6

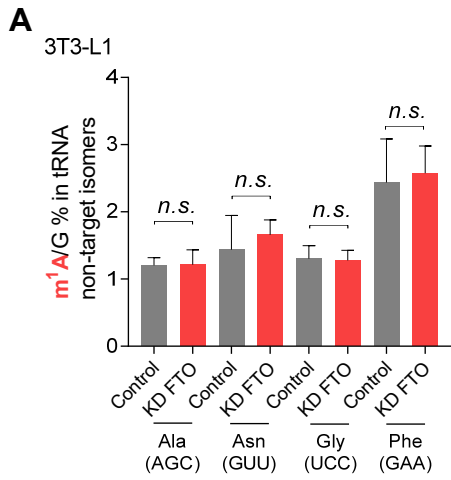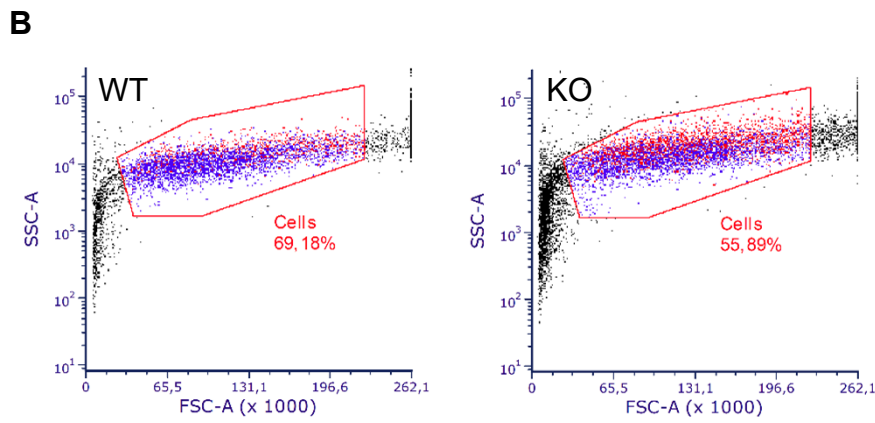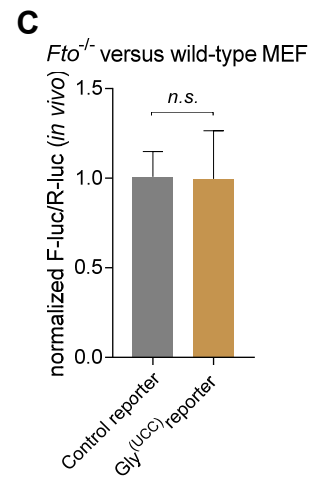

**Figure S6. Quantifications of m<sup>1</sup>A Level Changes in Non-Bound Individual tRNAs and Control Experiments for Translation Regulation, Related to Figure 6.**

(A) Quantification of the m<sup>1</sup>A/G ratio in several non-CLIP tRNAs by LC-MS/MS. In comparison to the control, no obvious changes of m<sup>1</sup>A/G ratios in tRNA<sup>Ala(AGC)</sup>, tRNA<sup>Asn(GUU)</sup>, tRNA<sup>Gly(UCC)</sup>, and tRNA<sup>Phe(GAA)</sup> can be observed. *P* value was determined using Student's t-test. \**p* < 0.05, \*\**p* < 0.01, \*\*\**p* < 0.001, \*\*\*\**p* < 0.0001. *n.s.* means not significant. Error bars, mean ± s.d. for *n* = 3 experiments.

(B) The flow-cytometry (FACS) gating strategy applied to wild-type (left) and *Fto*<sup>-/-</sup> (right) MEF cells.

(C) The effects of non-targets tRNA<sup>Gly(UCC)</sup> was revealed by the reporter assay, showing no noticeable increase of protein synthesis in *Fto*<sup>-/-</sup> MEF cell compared to the wild-type MEF cell. *P* value was determined using Student's unpaired t-test. \**p* < 0.05, \*\**p* < 0.01, \*\*\**p* < 0.001, \*\*\*\**p* < 0.0001. *n.s.* means not significant. Error bars, mean ± s.d. for *n* = 8 experiments in (C).

Table S4. Biotinylated single-stranded DNA probes designed to isolate specific tRNAs, related to Figure 6

|                          |                                             |
|--------------------------|---------------------------------------------|
| tRNA <sup>Glu(CUC)</sup> | 5'biotin-TTCCCTGACCGGGAATCGAACCCGGGCCG      |
| tRNA <sup>His(GUG)</sup> | 5'-biotin-TGCCGTCACCTCGGATTCGAACCGAGGTTGCTG |
| tRNA <sup>Gly(GCC)</sup> | 5'biotin-TGCATTGGCCGGGAATCGAACCCGGGGCCTC    |
| tRNA <sup>Asp(GUC)</sup> | 5'biotin-CTCCCCGTCGGGGAATCGAACCCCGGTCTC     |
| tRNA <sup>Lys(CUU)</sup> | 5'biotin-CCAACGTGGGGCTCGAACCCACGACCCT       |
| tRNA <sup>Gln(CUG)</sup> | 5'biotin-AGGTCCCACCGAGATTTGAACTCGGATCGCTGG  |
| tRNA <sup>Leu(CAA)</sup> | 5'biotin- TGTCAGAAGTGGGATTCGAACCCACGCCT     |
| tRNA <sup>Ala(AGC)</sup> | 5'biotin-TGGAGGATGCGGGCATCGATCCCGCTACC      |
| tRNA <sup>Asn(GUU)</sup> | 5'biotin-CGTCCCTGGGTGGGCTCGATCCACCAACC      |
| tRNA <sup>Gly(UCC)</sup> | 5'biotin- TCGTGGCCGGGAATCGAACCCGGGTCAAC     |
| tRNA <sup>Phe(GAA)</sup> | 5'biotin-TGCCGAAACCCGGGATCGAACCCAGGGAC      |
